# Supplementary material for: Biodegradable, pH-Sensitive Hollow Mesoporous Organosilica Nanoparticle (HMON) with Controlled Release of Pirfenidone and Ultrasound-Target-Microbubble-Destruction (UTMD) for Pancreatic Cancer Treatment
Source: PubMed Central journal article supplement (PMC6735371; doi:10.7150/thno.36135), 2019-08-14
Supplement: thnov09p6002s1.pdf [file thnov09p6002s1.pdf]

**Biodegradable, pH-Sensitive Hollow Mesoporous Organosilica Nanoparticle (HMON) with Controlled Release of Pirfenidone and Ultrasound-Target-Microbubble-Destruction (UTMD) for Pancreatic Cancer Treatment**

Feng Gao<sup>1#</sup>, Jianrong Wu<sup>2#</sup>, Shiwei Niu<sup>2#</sup>, Ting Sun<sup>1</sup>, Fan Li<sup>1</sup>, Yun Bai<sup>1</sup>, Lifang Jin<sup>1</sup>, Lizhou Lin<sup>1</sup>, Qiusheng Shi<sup>1✉</sup>, Li-Min Zhu<sup>2✉</sup>, Lianfang Du<sup>1✉</sup>

1. Department of Ultrasound, Shanghai General Hospital, Shanghai Jiaotong University School of Medicine, Shanghai 201600, P.R. China.

2. College of Chemistry, Chemical Engineering and Biotechnology, Donghua University, Shanghai 201620, P.R. China.

**Address for correspondence:**

Lianfang Du, Department of Ultrasound, Shanghai General Hospital, Shanghai Jiaotong University School of Medicine, Shanghai 201600, P.R. China.

Email: du\_lf@shsmu.edu.cn

Li-Min Zhu, College of Chemistry, Chemical Engineering and Biotechnology, Donghua University, Shanghai 201620, P.R. China.

Email: lzhu@dhu.edu.cn

Qiusheng Shi, Department of Ultrasound, Shanghai General Hospital, Shanghai Jiaotong University School of Medicine, Shanghai 201600, P.R. China.

Email: sqs19631989@163.com

**Author Contributions**

#: These authors contributed equally to this work.

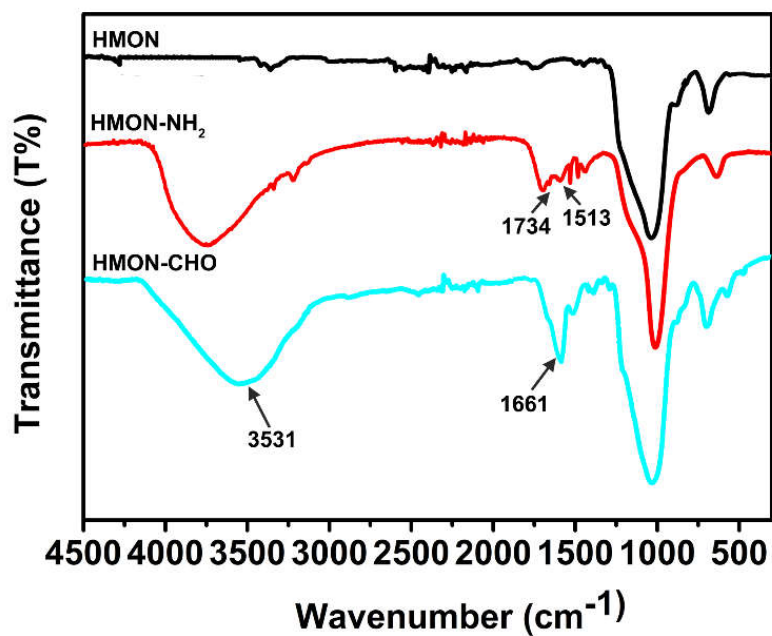

Figure S1. FT-IR spectra of HMON, HMON-NH<sub>2</sub> and HMON-CHO.

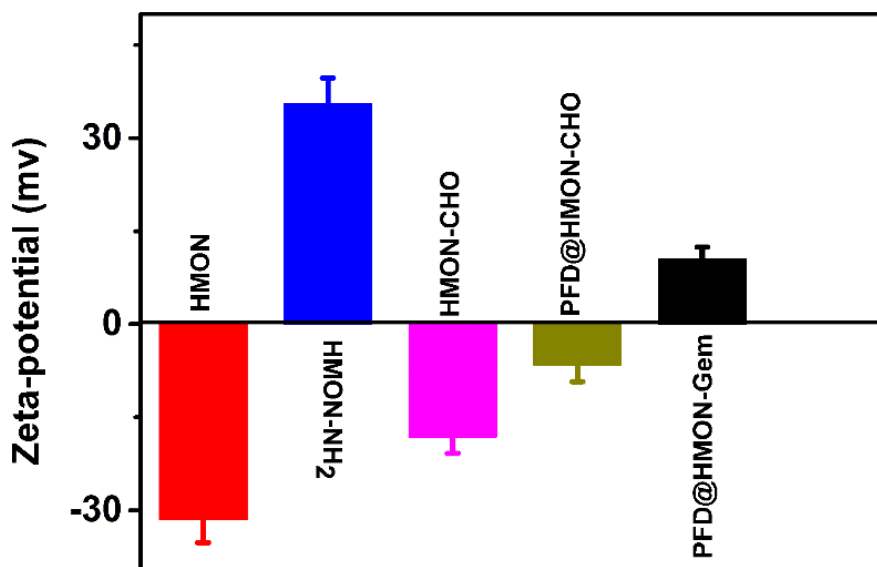

Figure S2. Zeta potentials of HMON, HMON-NH<sub>2</sub>, HMON-CHO, PFD@HMON-CHO and PFD@HMON-Gem nanoparticles.

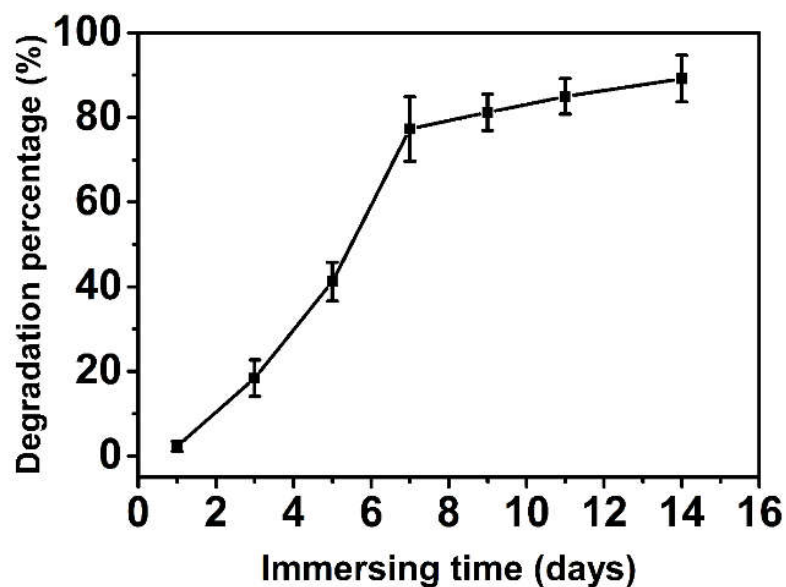

**Figure S3.** The degradation percentages of HMON-CHO over time were determined in GSH (10 mM) containing PBS solution.

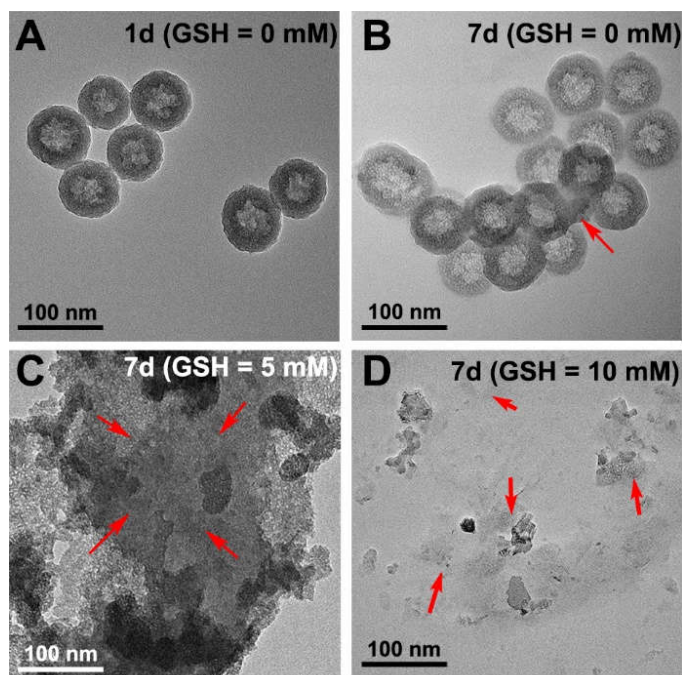

**Figure S4.** TEM images of HMON-CHO nanoparticles dispersed in in GSH containing PBS solution at elevated concentrations (0, 5, and 10 mM).

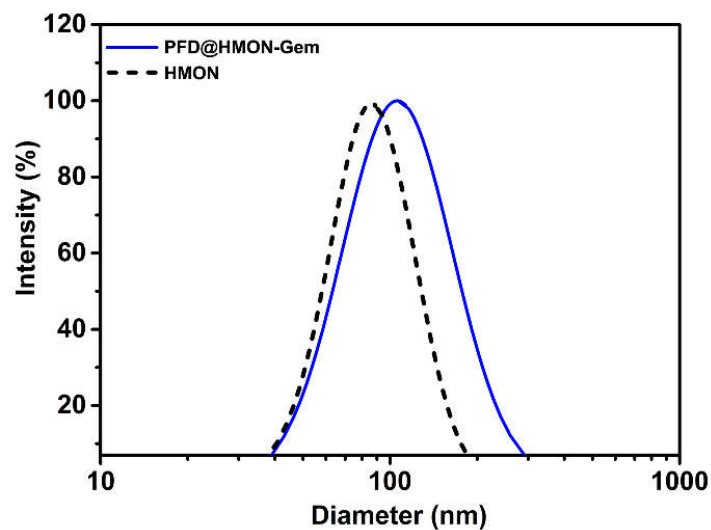

**Figure S5.** Hydrodynamic diameters of the HMON and PFD@HMON-Gem.

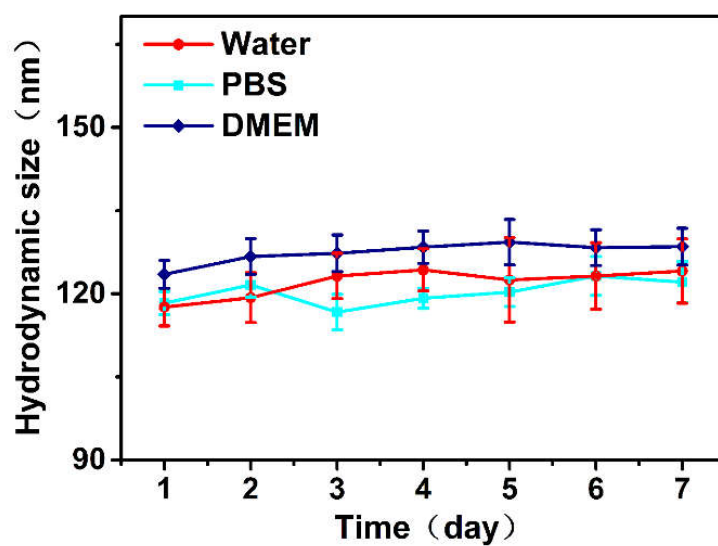

**Figure S6.** The stability of PFD@HMON-Gem nanoparticles in water, PBS or DMEM medium was investigated by measuring the hydrodynamic size of the particles.

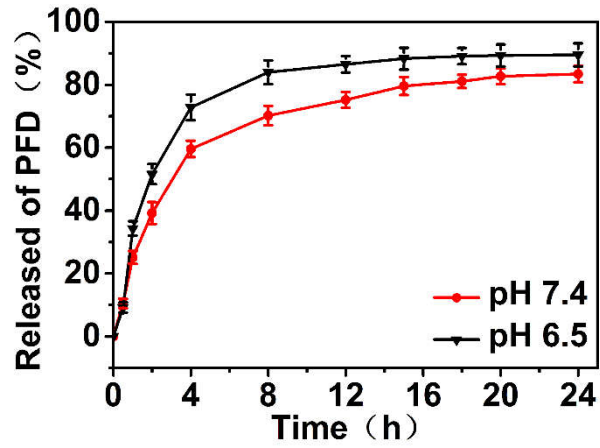

**Figure S7.** *In vitro* PFD release profiles from PFD@HMON at pH 7.4 or 6.5 in PBS.

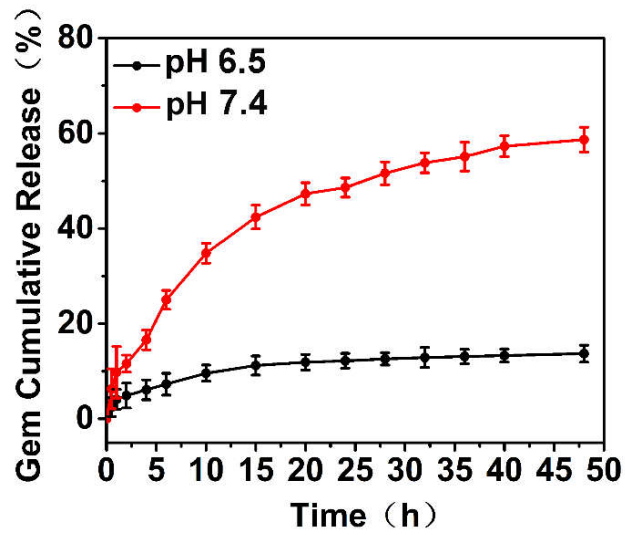

**Figure S8.** *In vitro* gemcitabine release profiles from PFD@HMON-Gem at different pH values.

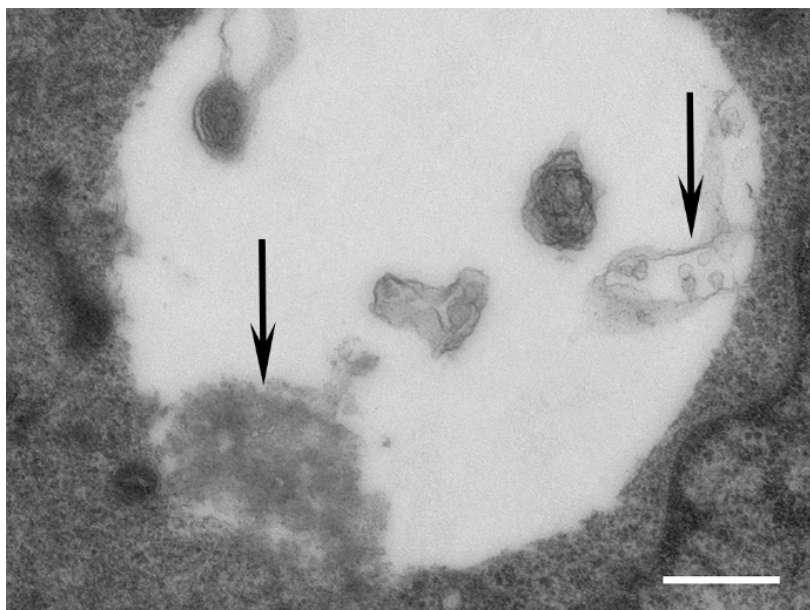

**Figure S9.** Intracellular biodegradation assay by direct bio-TEM observation. The arrows indicate the structural collapse and nanoparticle dissolution of HMON. (bar = 500nm)

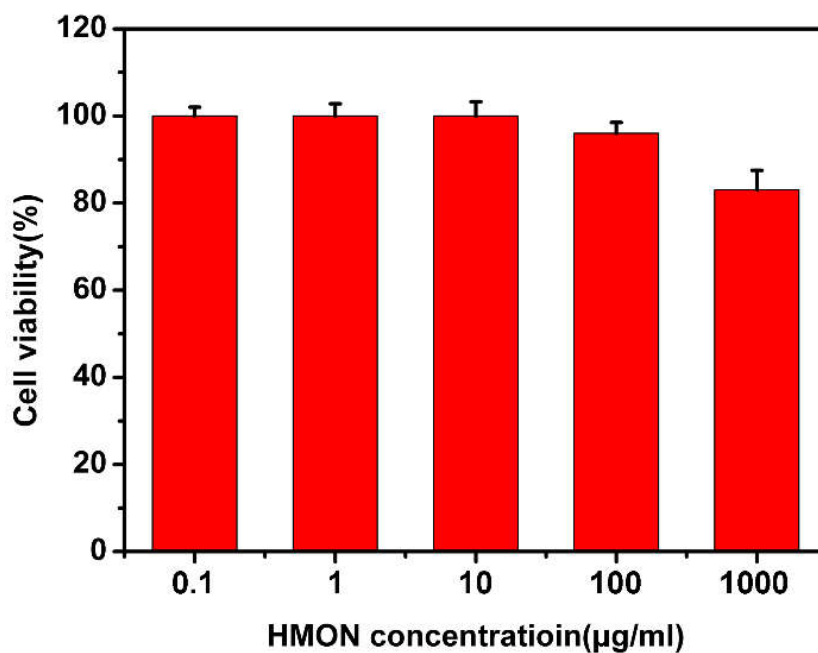

**Figure S10.** Cell viability of HUVEC cells after incubated with HMON for 24 h.

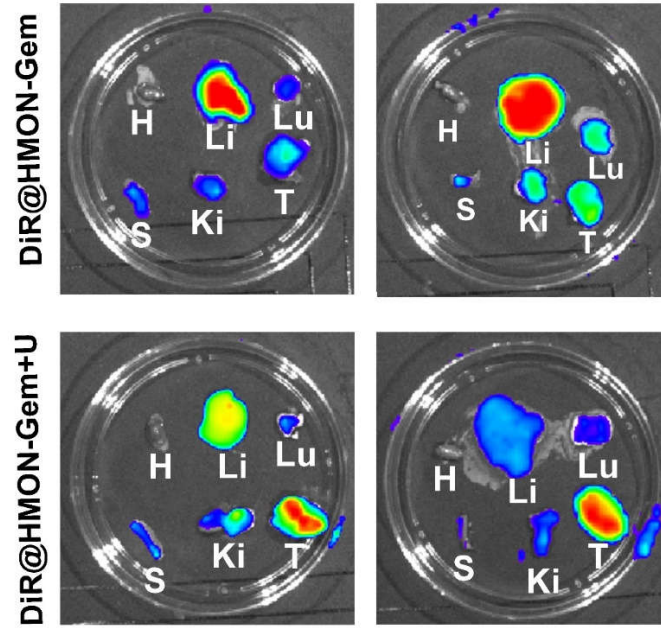

**Figure S11.** *Ex vivo* DiR fluorescence images of tumors and major organs (Li: liver, S: spleen, Ki: kidney, Lu: lung, H: heart and T: tumor).

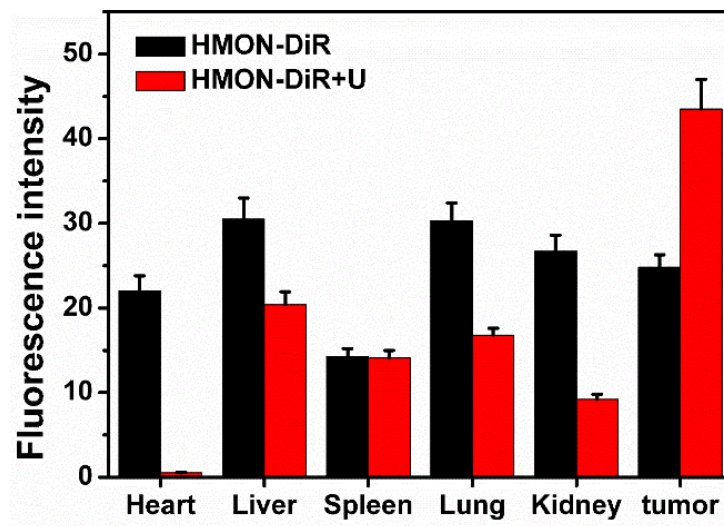

**Figure S12.** Statistical analysis of hearts, livers, spleens, lungs, kidneys and tumors harvested after sacrifice ( $n = 3$ , results are shown as mean  $\pm$  S.D.).

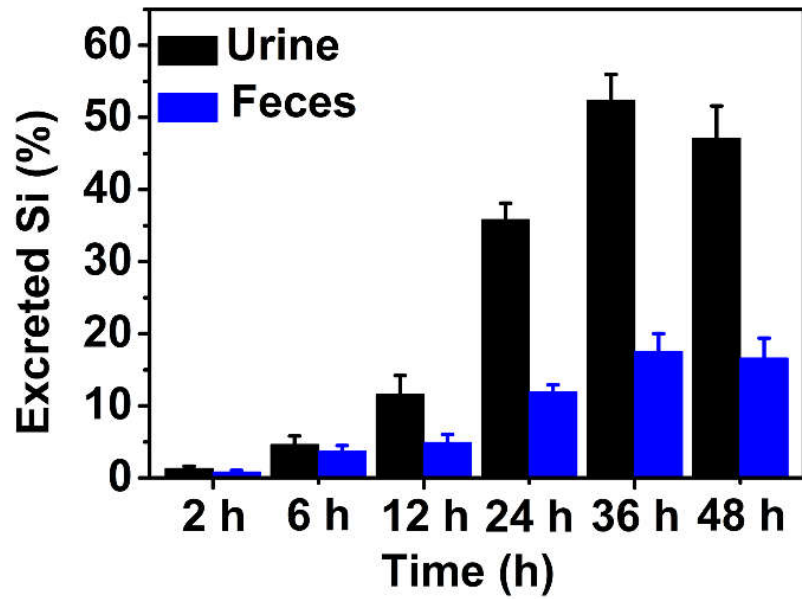

**Figure S13.** Time-dependent distribution by measuring Ir concentration of PFD@HMON-Gem NPs in urine and feces collected at various time points after injection.

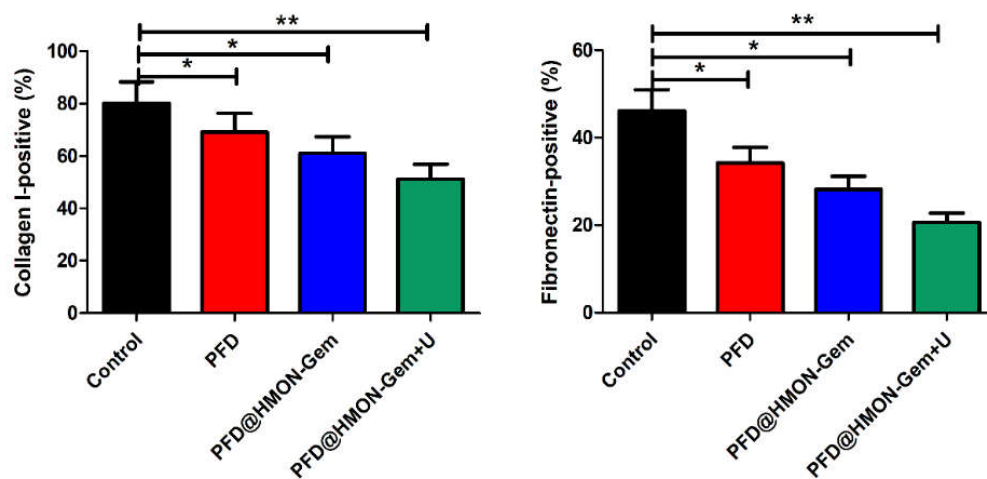

**Figure S14.** Quantitative analysis of collagen I/fibronectin-positive staining areas in each group (mean  $\pm$  S.D.,  $n = 5$ ), \*  $P < 0.05$ , \*\*  $P < 0.01$  as compared to control group.



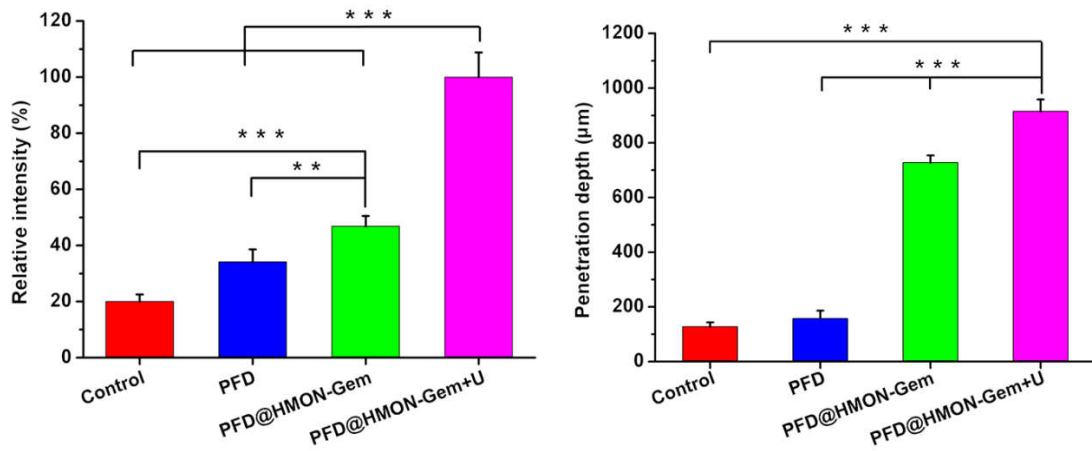

**Figure S15.** Rhodamine relative intensity and penetration depth in tumor.

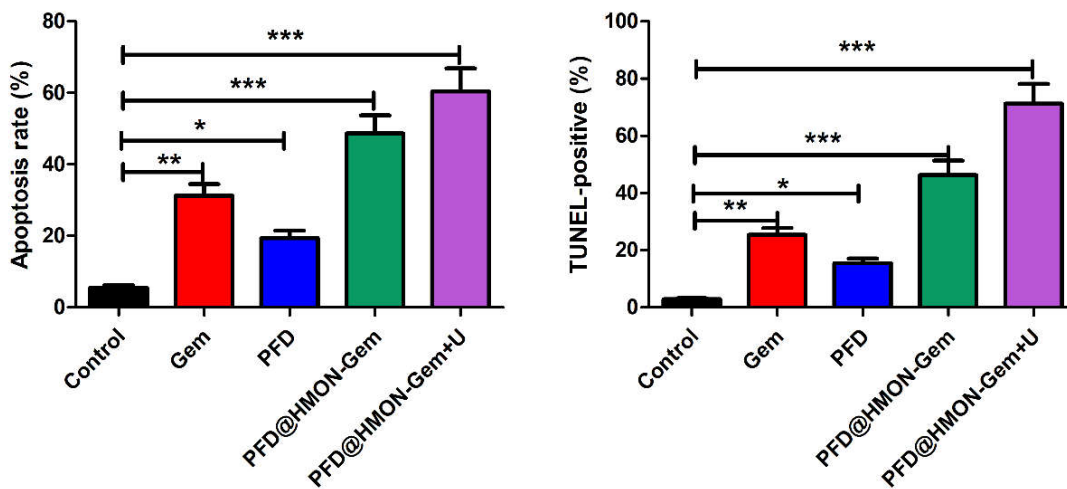

**Figure S16.** Quantitative analysis of cell apoptosis and TUNEL-positive in each group (mean  $\pm$  S.D.,  $n = 6$ ), \*  $P < 0.05$ , \*\*  $P < 0.01$  and \*\*\*  $P < 0.001$  as compared to control group.

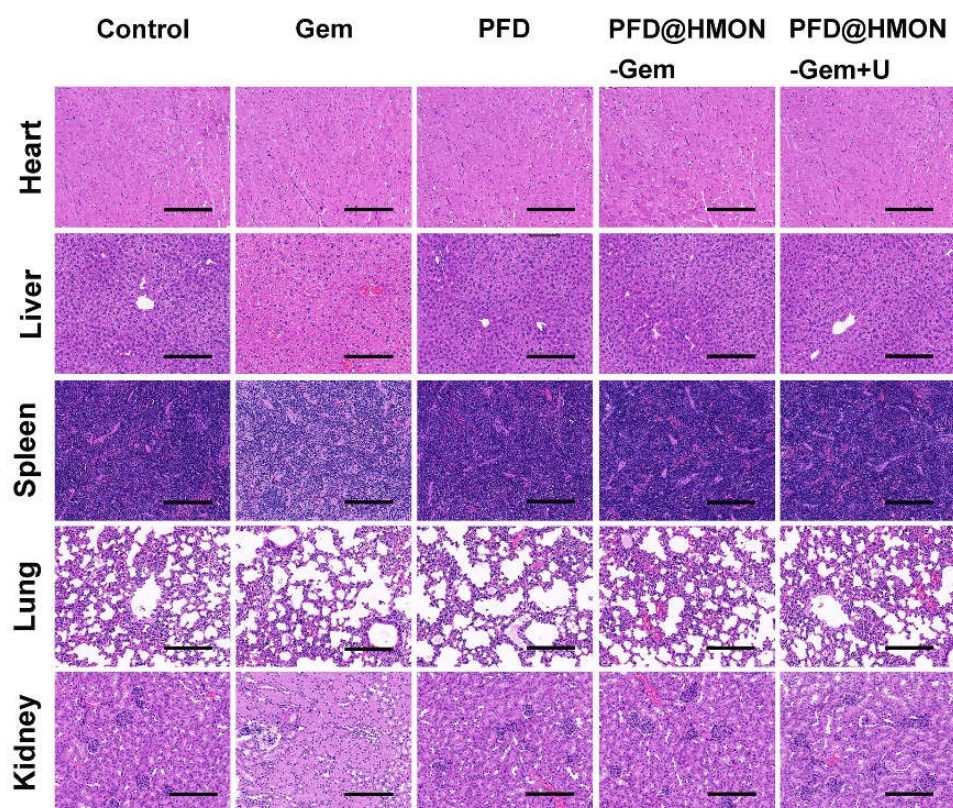

**Figure S17.** Representative H&E sections of organ tissues (heart, liver, spleen, lung, and kidney) of tumor-bearing mice after treatment with either saline, Gem, PFD, PFD@HMON-Gem or PFD@HMON-Gem + UTMD. The scale bar, 200  $\mu$ m.

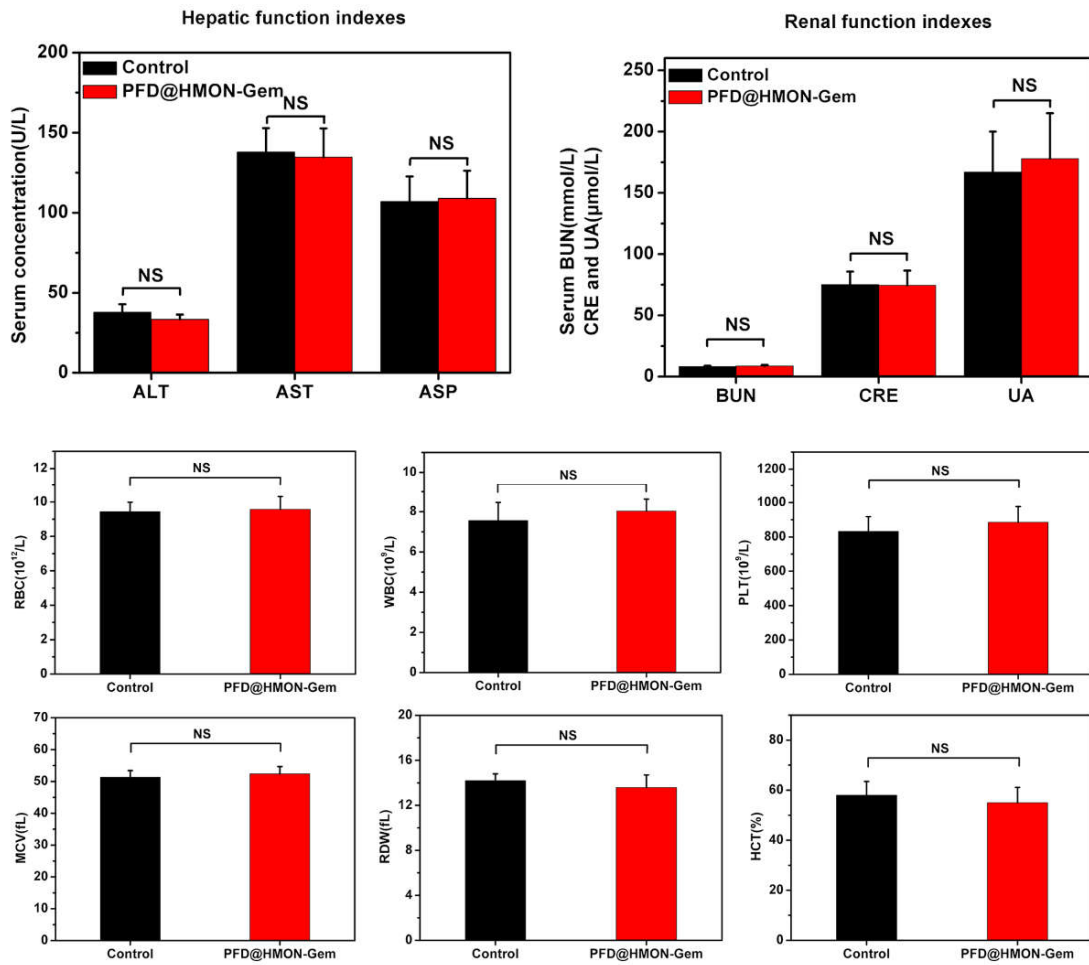

**Figure S18.** The blood cell analysis and the detection of routine biochemistry indicators.

**Table S1.** The values for describing Figure 3E.

---

|                 |          |          |          |           |           |           |           |           |           |            |            |            |            |            |
|-----------------|----------|----------|----------|-----------|-----------|-----------|-----------|-----------|-----------|------------|------------|------------|------------|------------|
| <b>Time (h)</b> | <b>0</b> | <b>3</b> | <b>6</b> | <b>12</b> | <b>18</b> | <b>24</b> | <b>36</b> | <b>72</b> | <b>96</b> | <b>120</b> | <b>144</b> | <b>168</b> | <b>240</b> | <b>360</b> |
|-----------------|----------|----------|----------|-----------|-----------|-----------|-----------|-----------|-----------|------------|------------|------------|------------|------------|

---

|                      |             |           |             |           |           |           |             |             |             |             |             |             |             |           |
|----------------------|-------------|-----------|-------------|-----------|-----------|-----------|-------------|-------------|-------------|-------------|-------------|-------------|-------------|-----------|
| <b>Diameter (nm)</b> | <b>87.7</b> | <b>79</b> | <b>76.8</b> | <b>68</b> | <b>54</b> | <b>46</b> | <b>41.8</b> | <b>39.3</b> | <b>38.4</b> | <b>32.1</b> | <b>30.3</b> | <b>29.8</b> | <b>25.2</b> | <b>21</b> |
|----------------------|-------------|-----------|-------------|-----------|-----------|-----------|-------------|-------------|-------------|-------------|-------------|-------------|-------------|-----------|

---
